# Supplementary material for: Assessment of the Impact of Atmospheric Cold Plasma Application on Wound Healing in Streptozotocin-Induced Diabetic Rats
Source: Research Square preprint supplement (doi:10.21203/rs.3.rs-8570395/v1), 2026-01-29
Supplement: Supplementary file 1 [file 34cc2515853f861eeed60eb7.docx]

**Pictures**

**
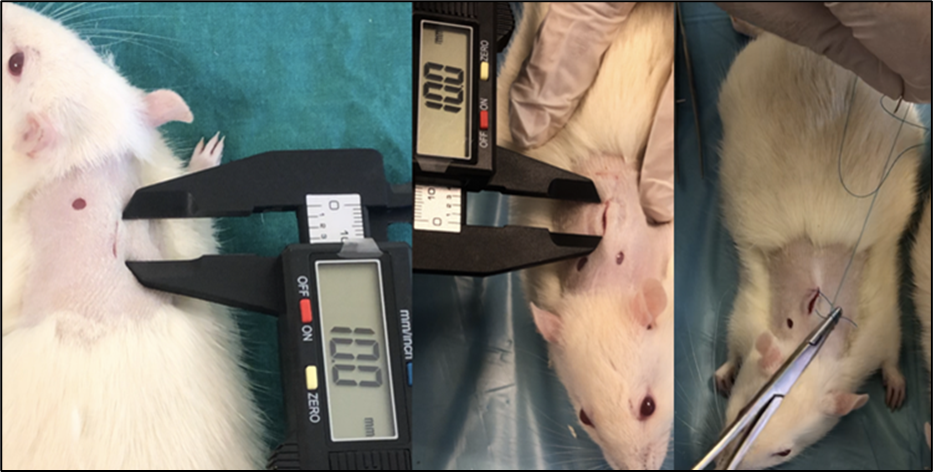
**

**Picture 1.** Wound opening and suturing

**
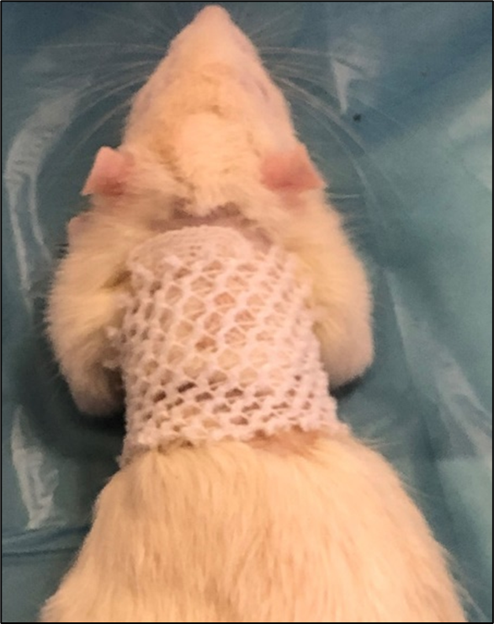
**

**Picture 2.** Isotonic wet dressing

**
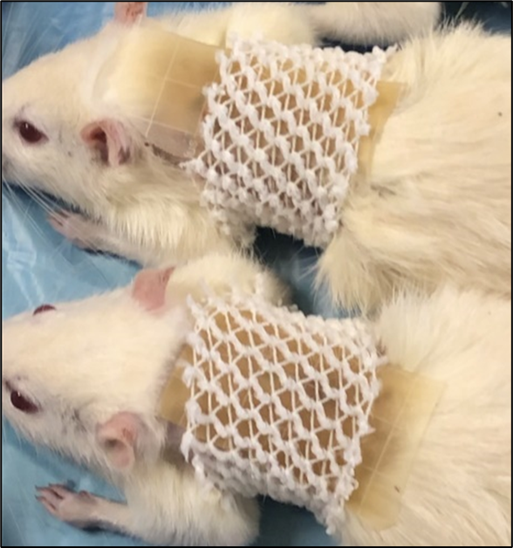
**

**Picture 3.** Hydrocolloid dressing

**
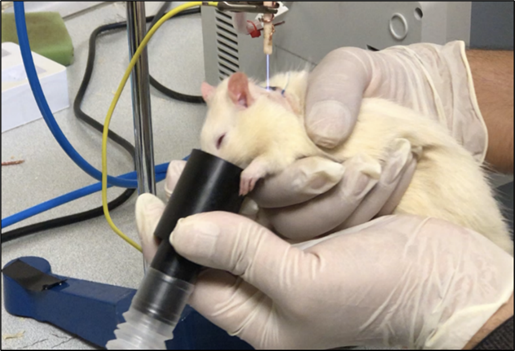
**

**Picture 4.** APPJ application

**
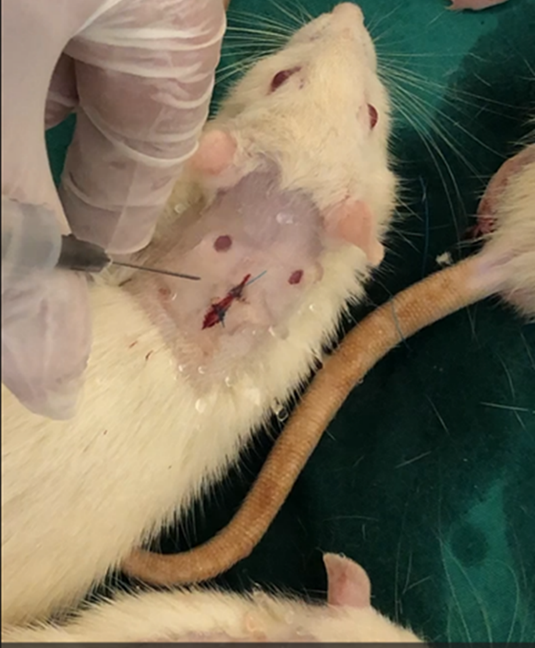
**

**Picture 5.** Medium application

**
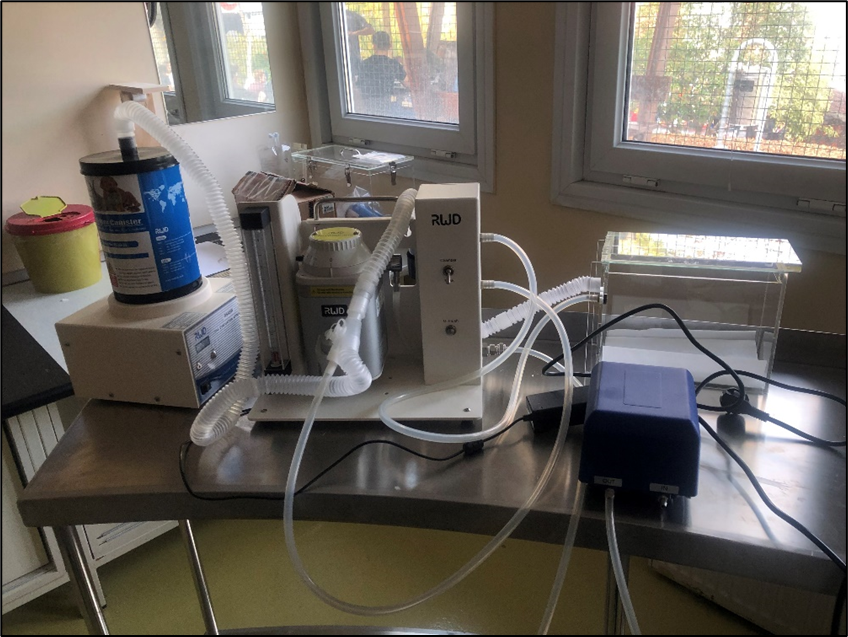
**

**Picture 6.** Sedation device

**
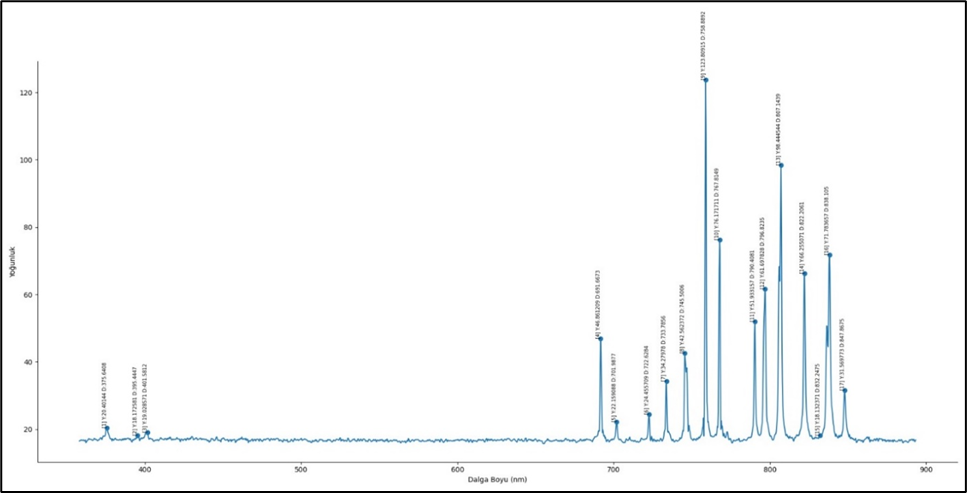
**

**Picture 7.** Measuring Plasma with Spectrometer

**
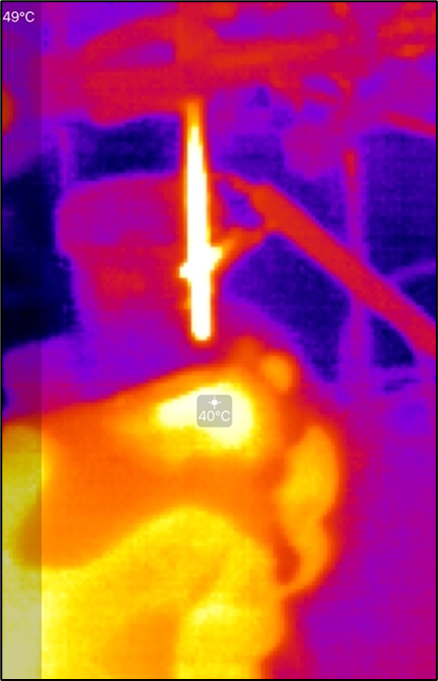
**

**Picture 8.** Measuring plasma temperature with a thermal camera


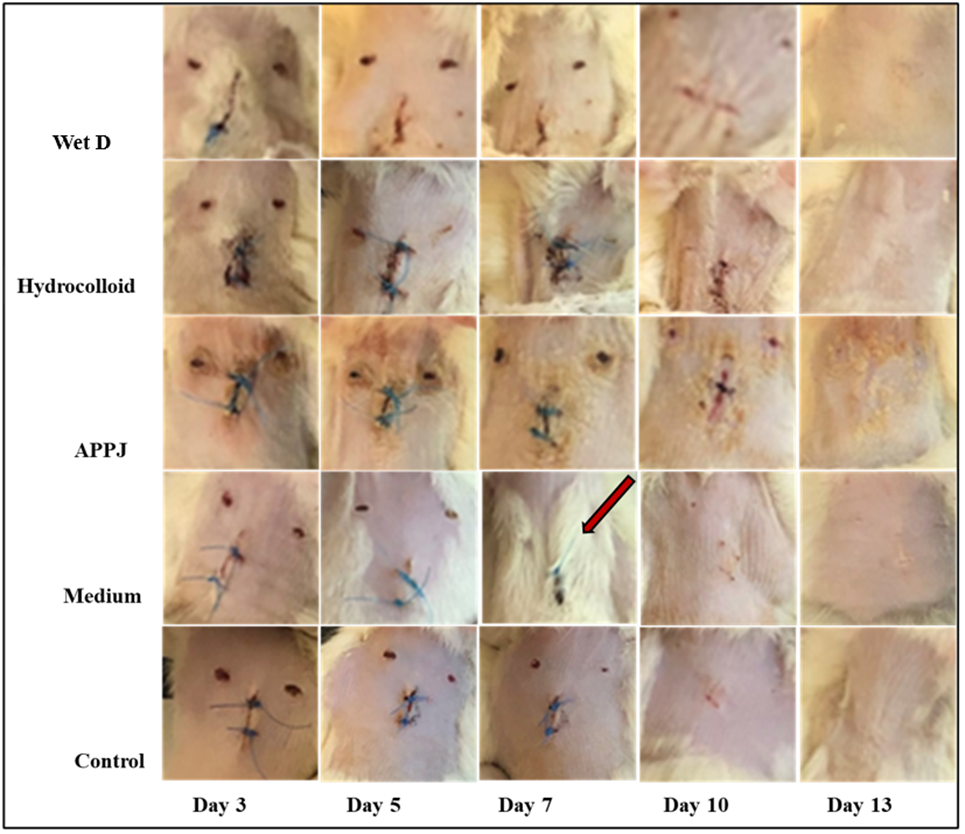


**Picture 9.** Monitoring of wound healing
